# Supplementary material for: Common polygenic variation in coeliac disease and confirmation of ZNF335 and NIFA as disease susceptibility loci
Source: PubMed Central journal article supplement — Eur J Hum Genet. 2015 Apr 29;24(2):291–7. doi: 10.1038/ejhg.2015.87 (PMC4717209; doi:10.1038/ejhg.2015.87), 2015-04-29

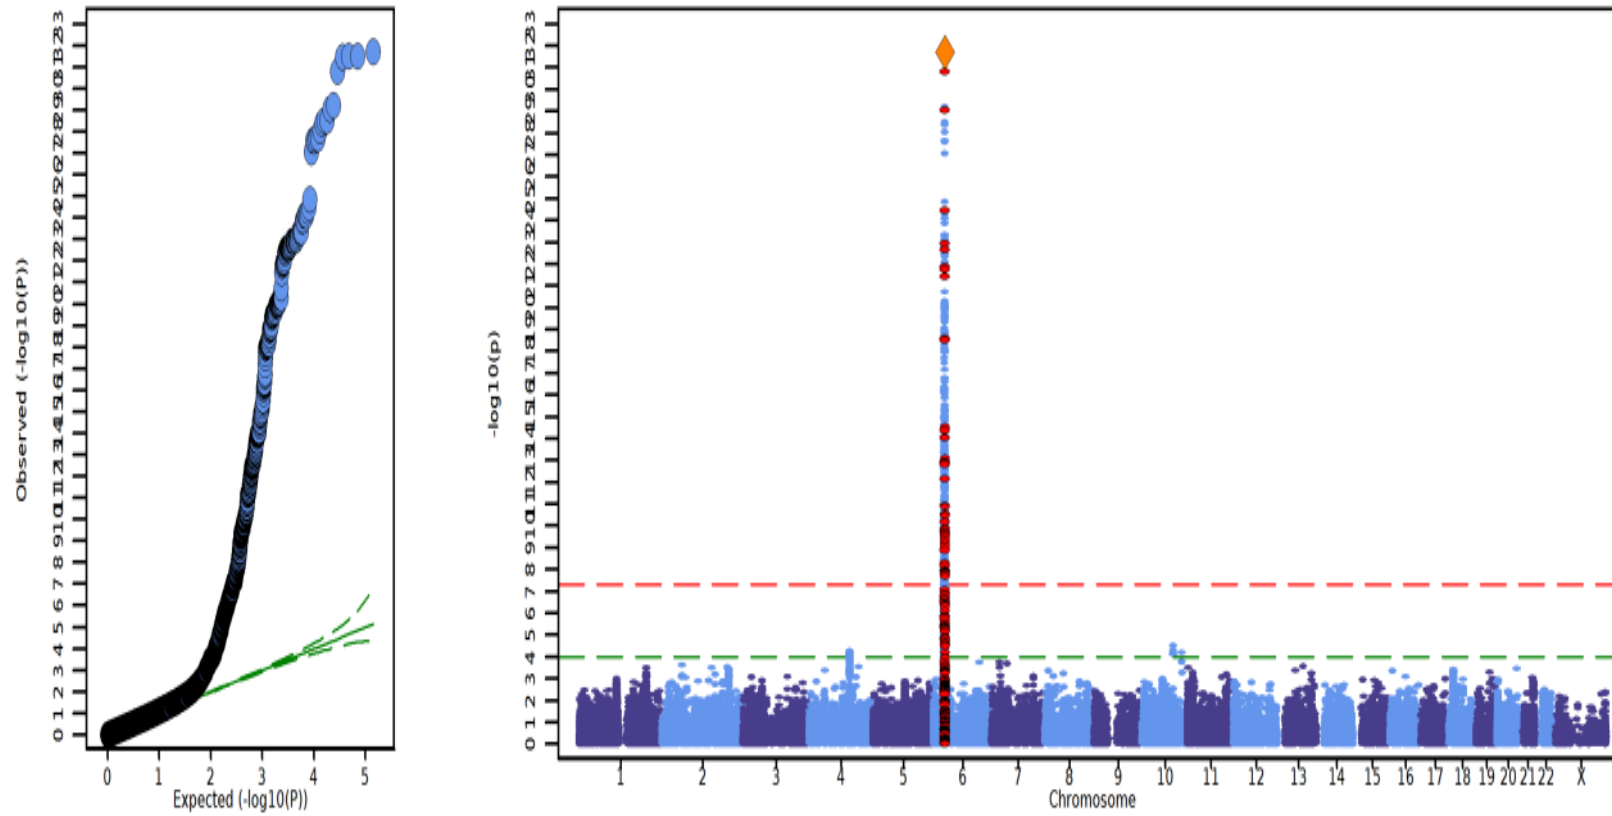

Supplementary Figure 1(a): QQ and Manhattan plots for all SNPs.

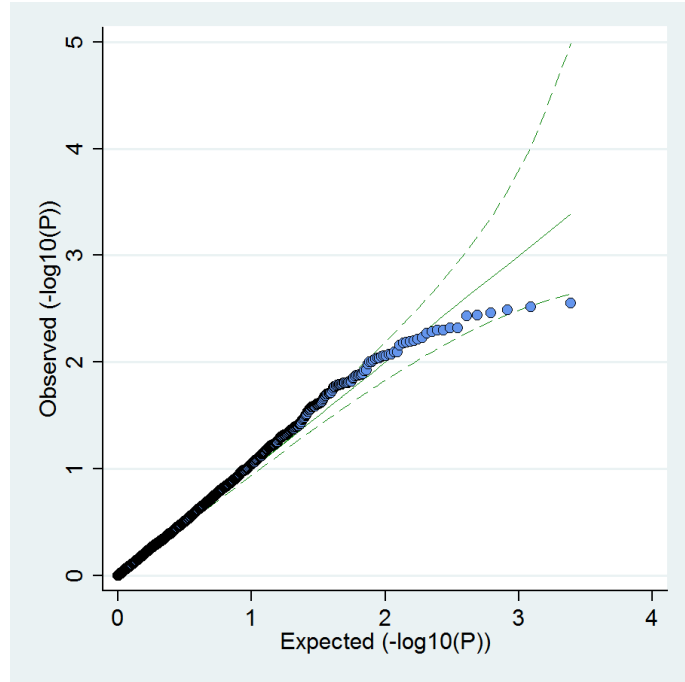

Supplementary Figure 1(b): QQ plot of the “null” SNPs not associated with autoimmune diseases ( $\lambda = 1.02$ )

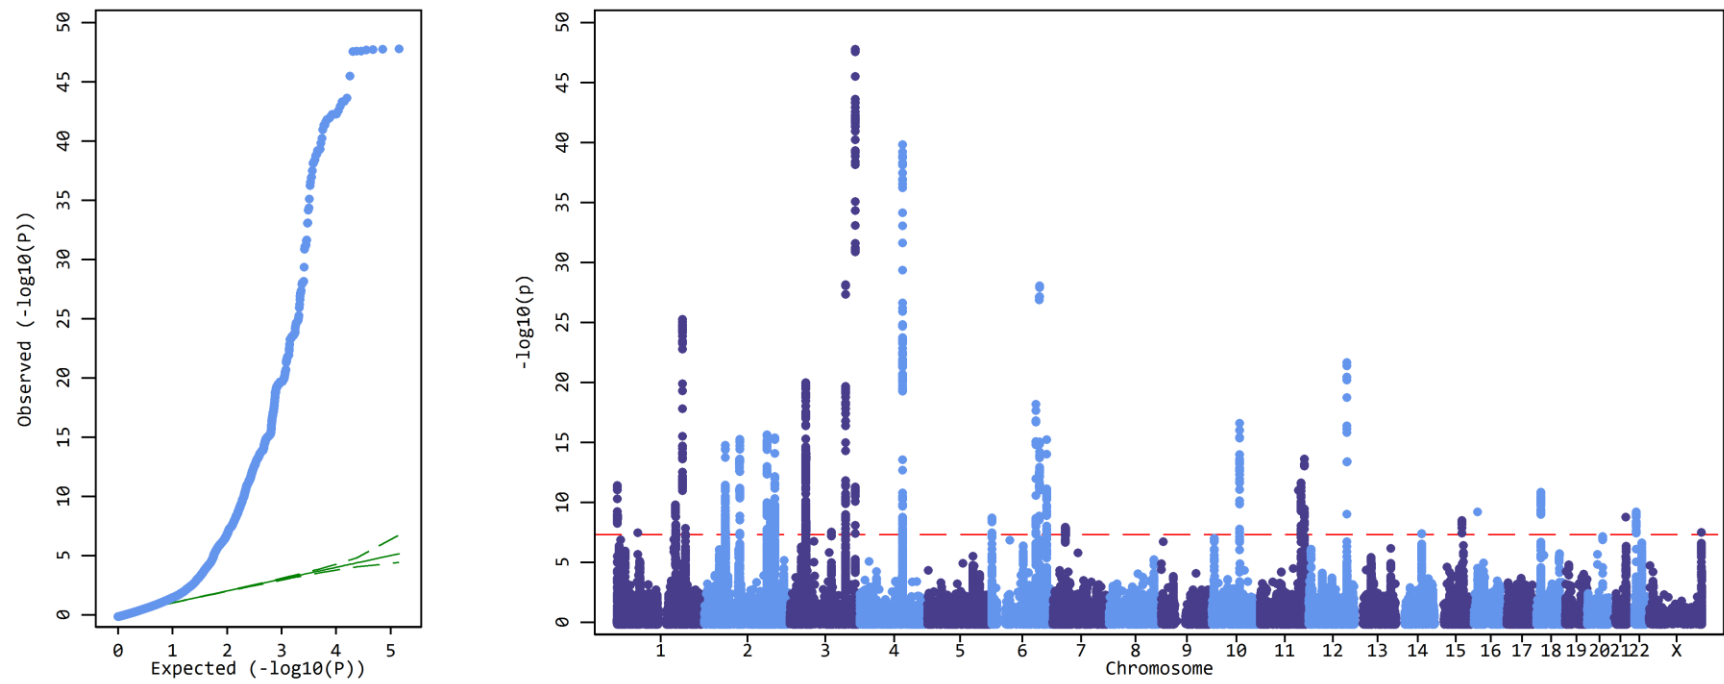

Supplementary Figure 2: QQ and Manhattan plots from the Meta-analysis of the Irish and Trynka *et al* datasets excluding the HLA/MHC locus (chr6:20-40Mb)

Supplementary Figures (i)-(viii): Distribution of polygene scores across all SNPs for Coeliac disease individuals (affected) and controls(unaffected) for p values of  $<0.5$  (fig(i)) to  $<5e-8$  (fig(viii)) . The median score, along with the upper and lower quartiles, are represented by vertical dark red, blue and orange lines respectively. At each threshold, the polygene scores were significantly higher for individuals with CD when compared to controls.

Figure i

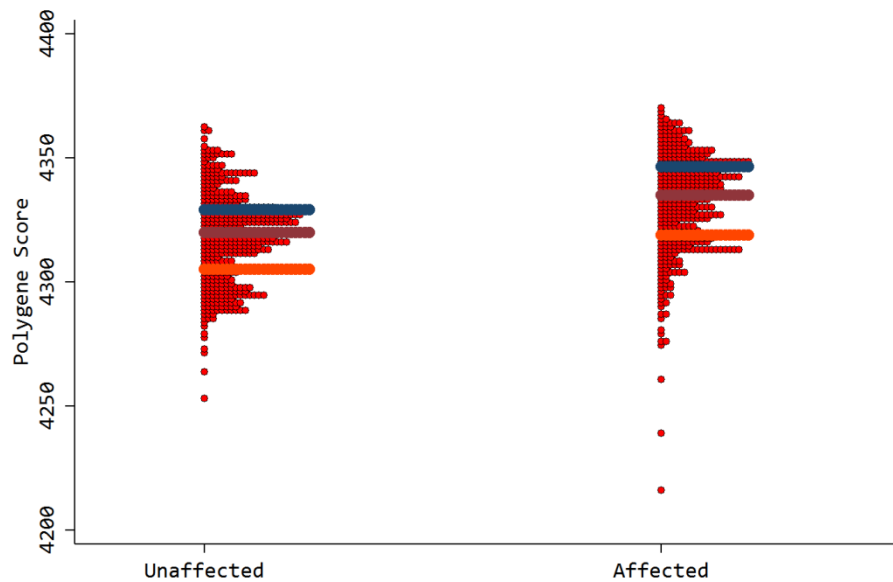

Figure ii

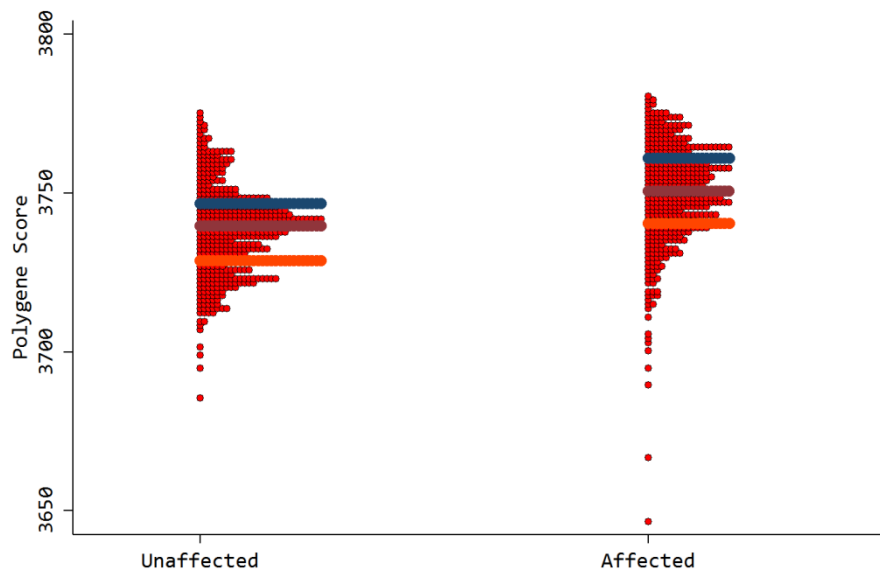

Figure iii

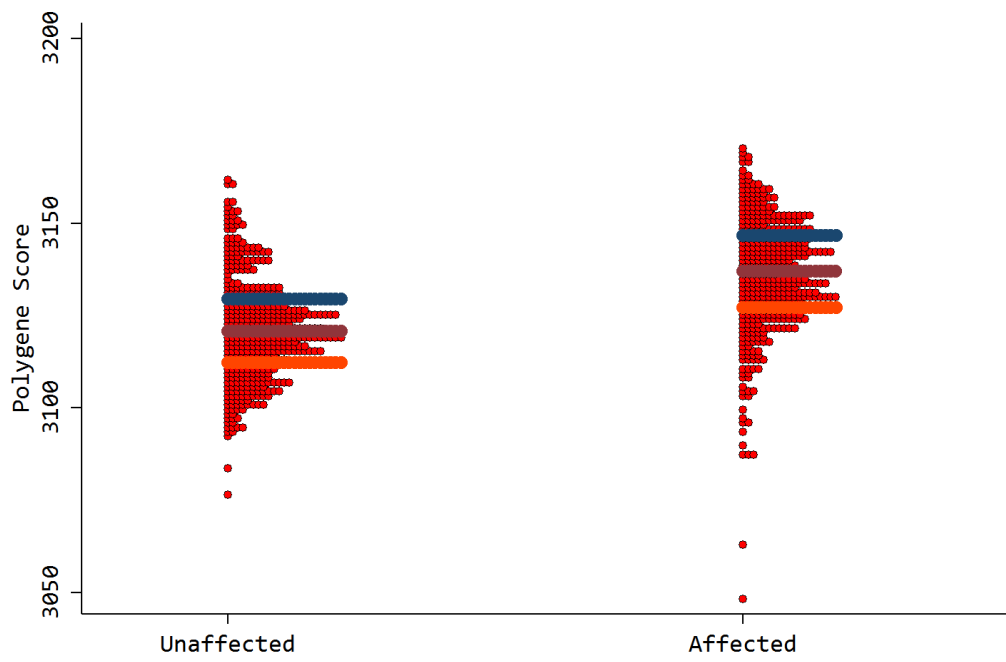

Figure iv

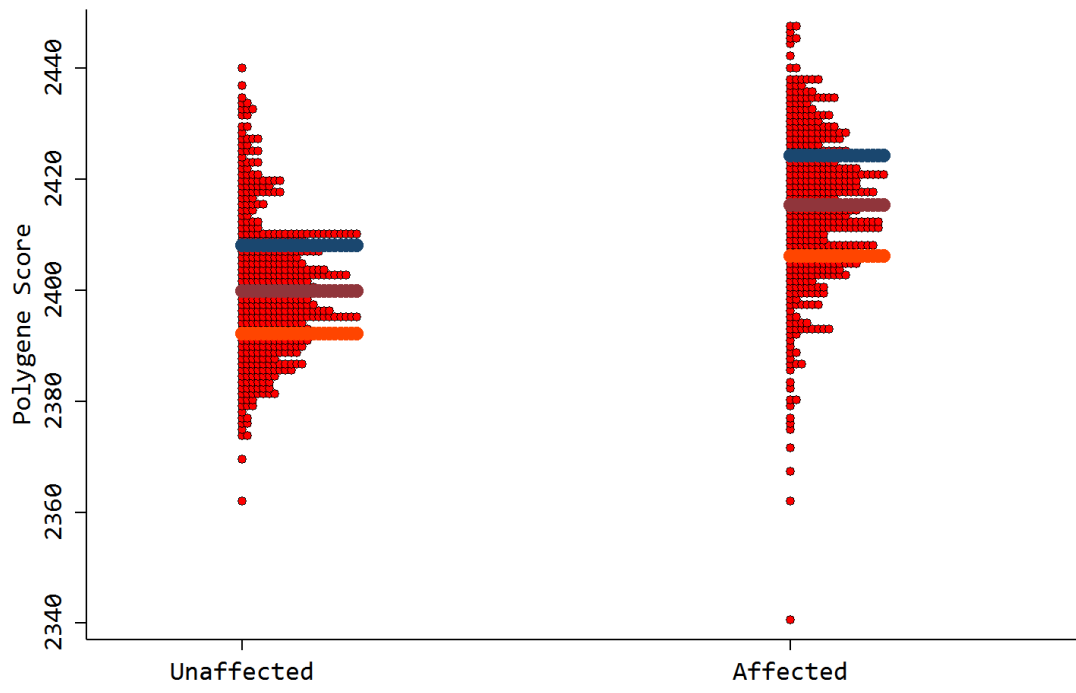

Figure v

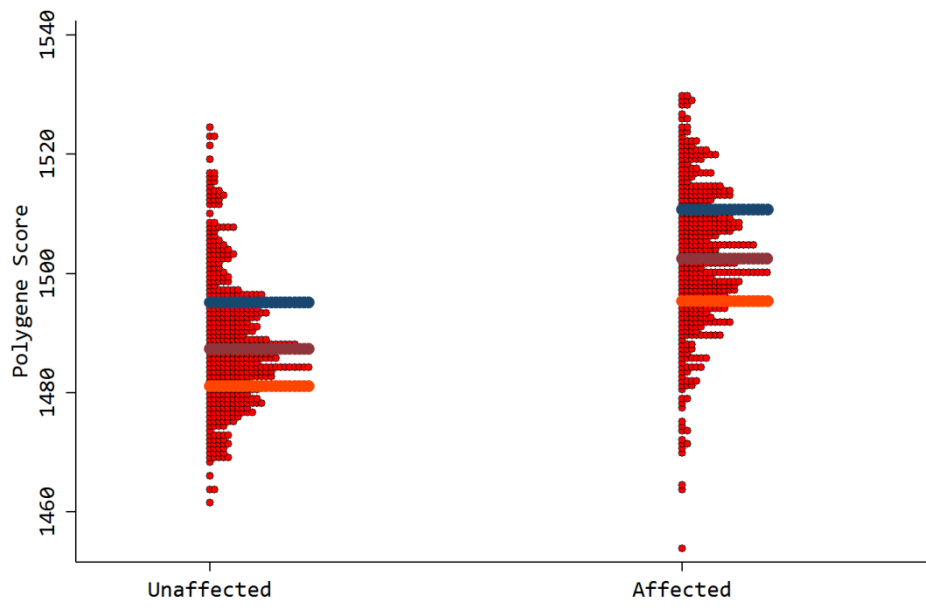

Figure vi

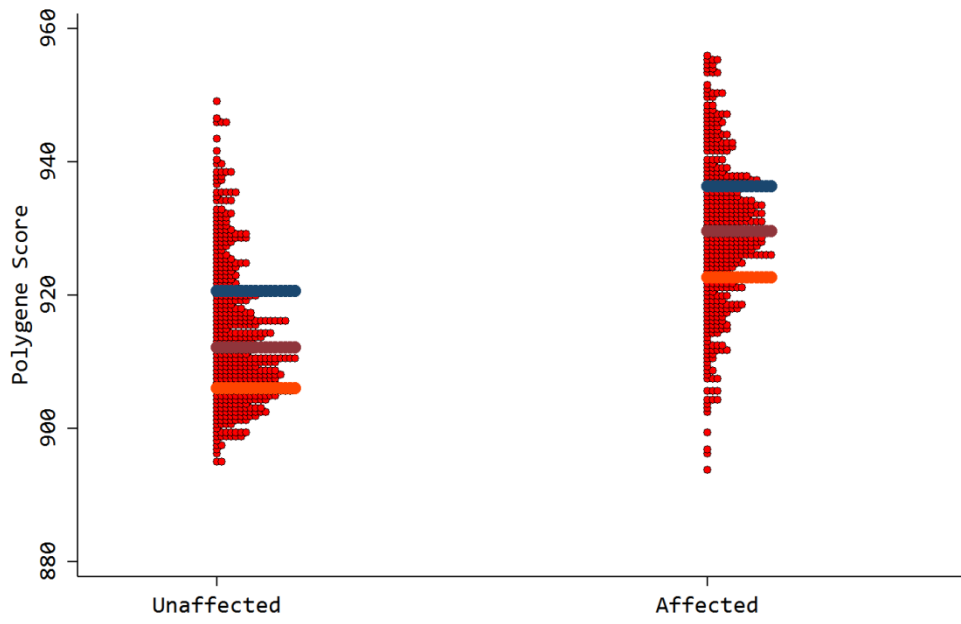

Figure vii

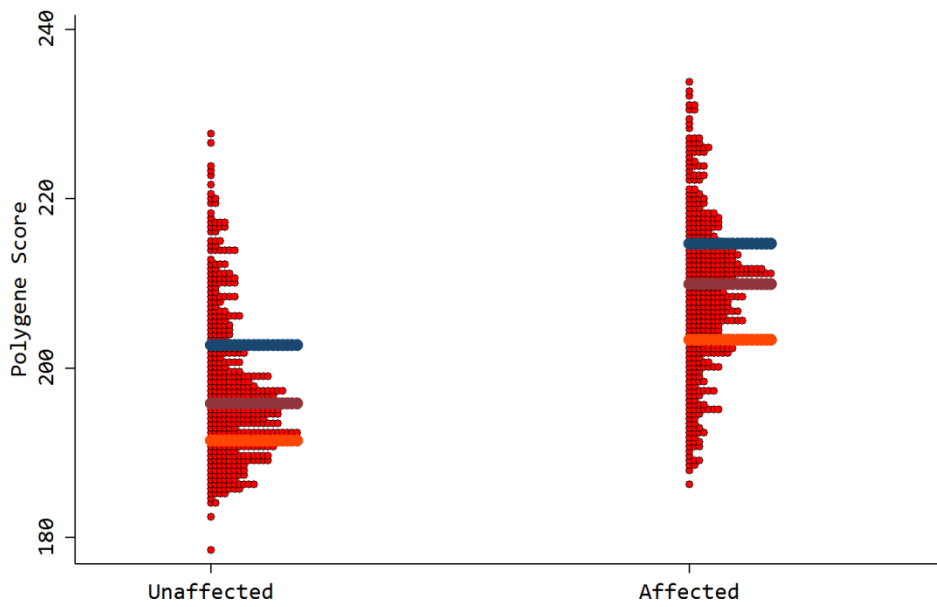

Figure viii

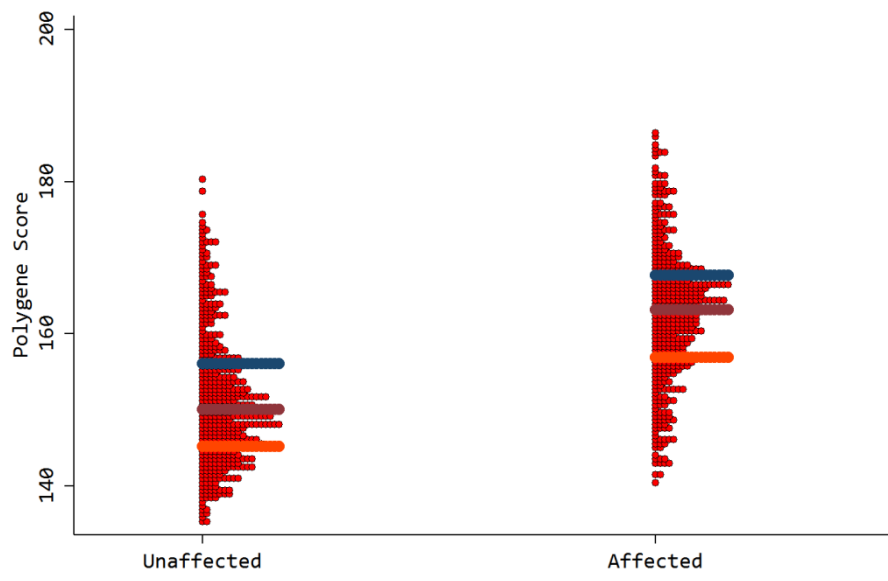



Supplementary Figures (ix)-(xvi): Distribution of polygene scores across non-HLA SNPs for Coeliac disease individuals (affected) and controls(unaffected) for p values of  $<0.5$  (fig(i)) to  $<5e-8$  (fig(viii)) . The median score, along with the upper and lower quartiles, are represented by vertical dark red, blue and orange lines respectively. At each threshold, the polygene scores were significantly higher for individuals with CD when compared to controls.

Figure ix

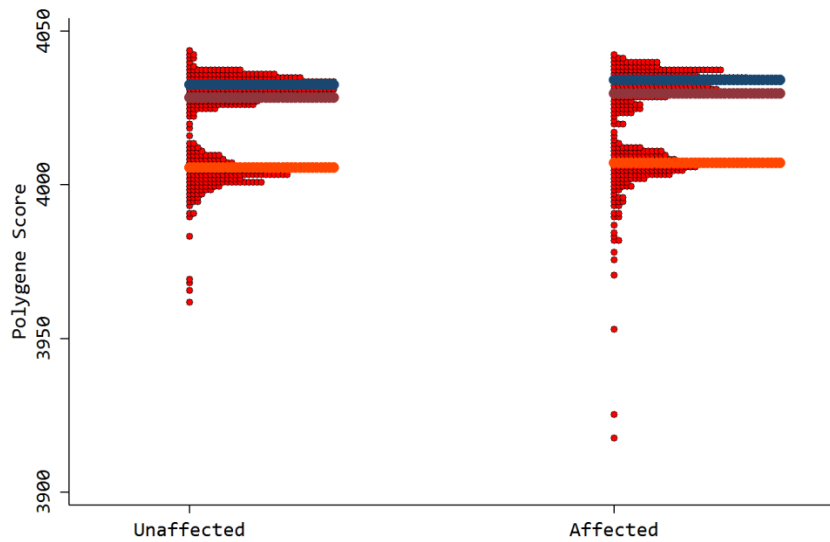

Figure x

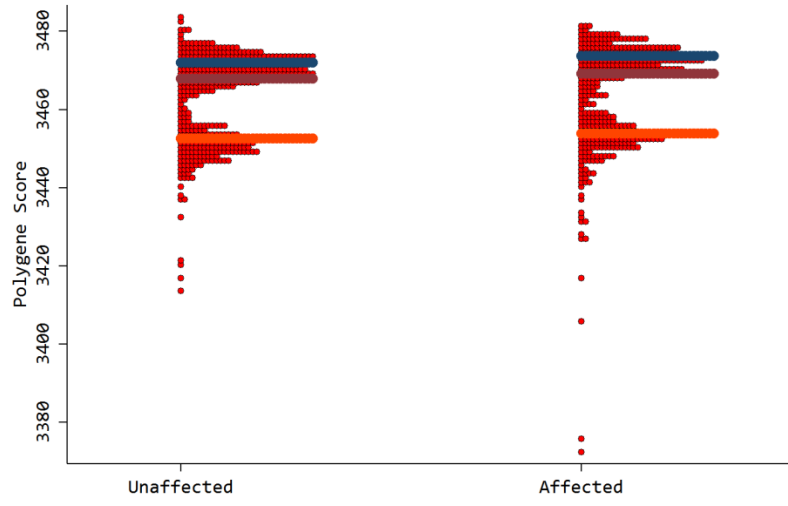

Figure xi

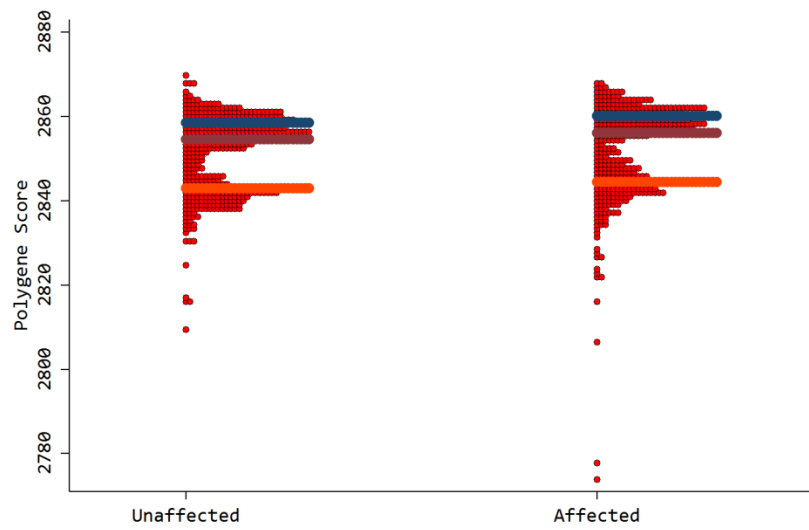

Figure xii

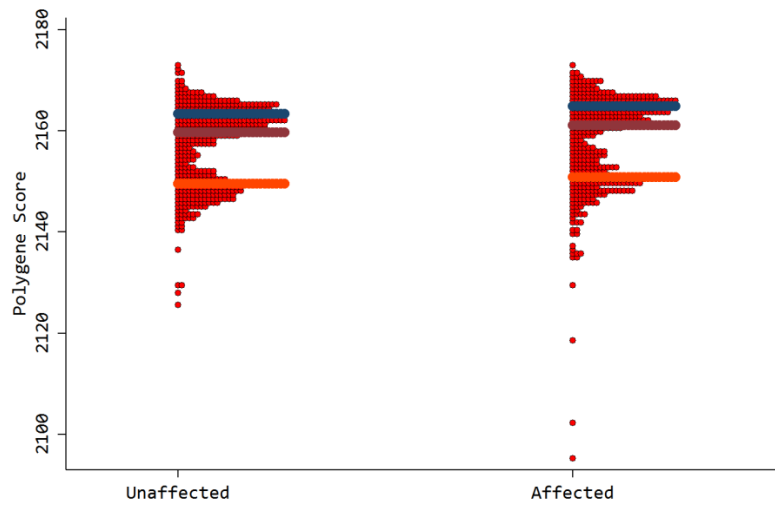

Figure xiii

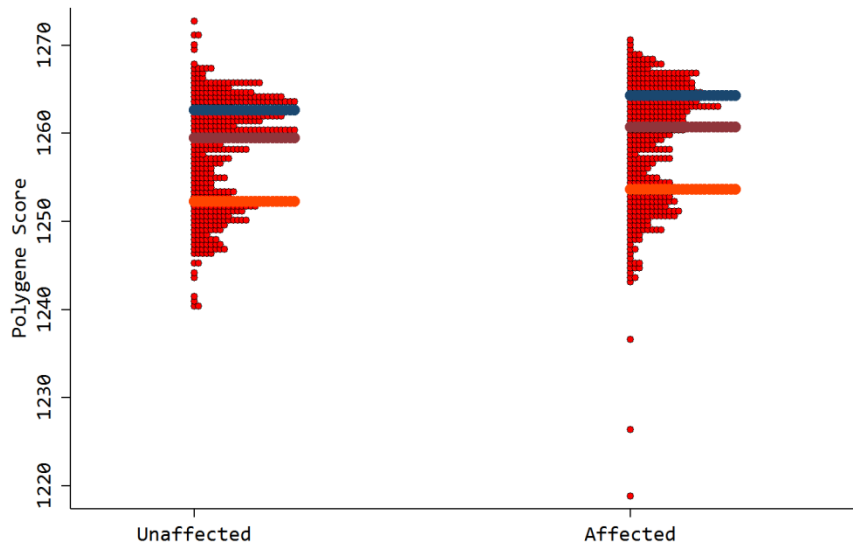

Figure xiv

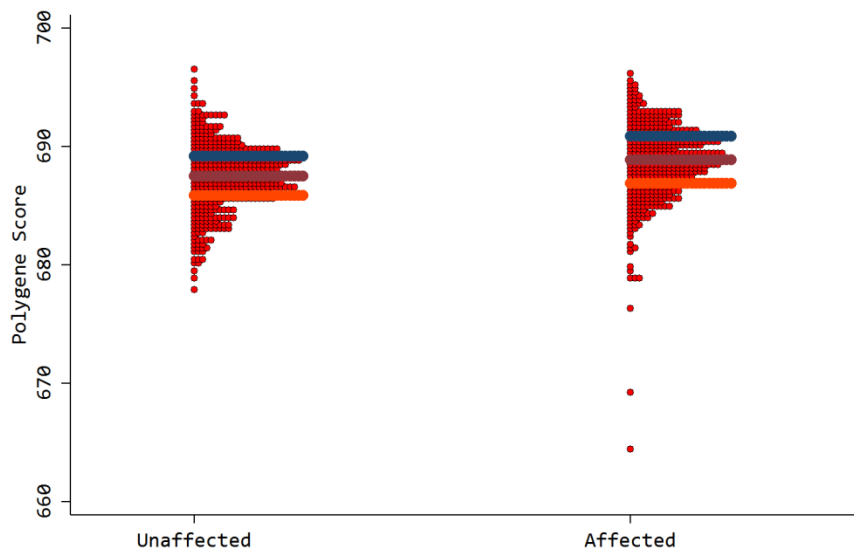

Figure xv

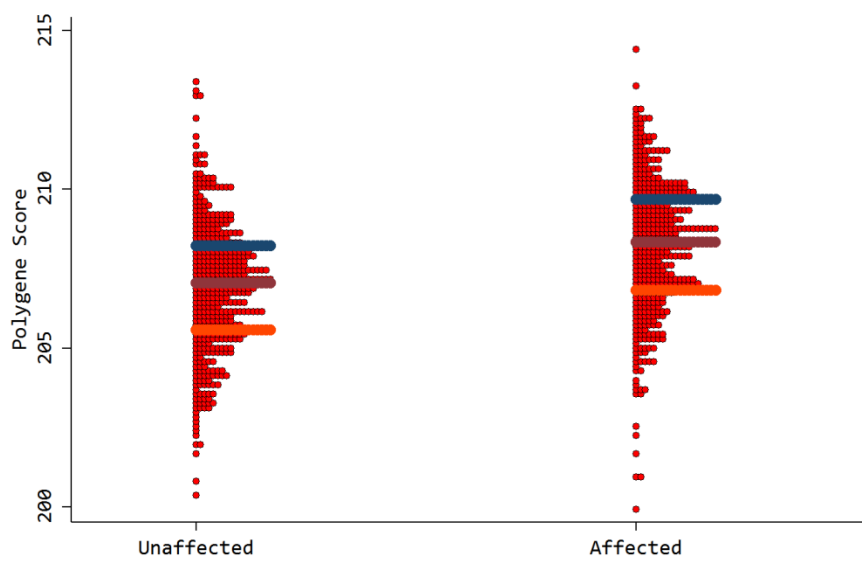

Figure xvi

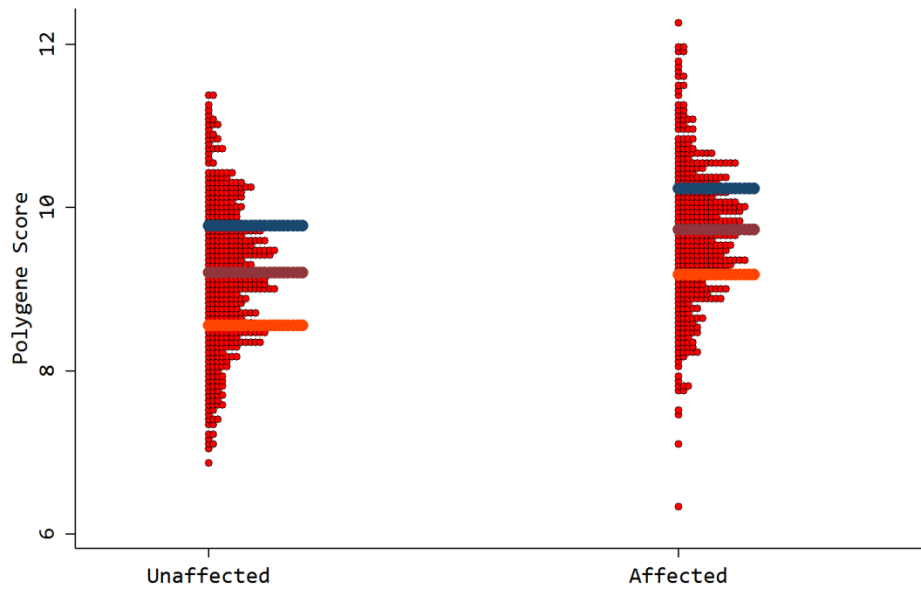

Supplement: ejhg201587x1.pdf [file ejhg201587x1.pdf]
